# Supplementary material for: Morusflavone, a New Therapeutic Candidate for Prostate Cancer by CYP17A1 Inhibition: Exhibited by Molecular Docking and Dynamics Simulation
Source: MDPI journal article supplement (doi:10.3390/plants10091912), 2021-09-14
Supplement: s1 [file s1]

# Morusflavone, a new therapeutic candidate for prostate cancer by CYP17A1 inhibition: Exhibited by molecular docking and dynamics simulation

Sayed Aliul Hasan Abdi <sup>1</sup>, Amena Ali <sup>2</sup>, Shabihul Fatma Sayed <sup>3</sup>, Mohamed Jawed Ahsan <sup>4</sup>, Abutahir <sup>5</sup>, Wasim Ahmad <sup>6</sup>, Shatrúnajay Shukla <sup>7</sup>, Abuzer Ali <sup>8\*</sup>

<sup>1</sup> Department of Pharmacy, Al Baha University, Kingdom of Saudi Arabia; sayedaliulhasan@gmail.com

<sup>2</sup> Department of Pharmaceutical Chemistry, College of Pharmacy, Taif University, P.O. Box 11099, Taif 21944, Saudi Arabia; amrathore@tu.edu.sa

<sup>3</sup> Department of Nursing, University College Farasan Campus, Jazan University, Kingdom of Saudi Arabia; Ssaid@jazanu.edu.sa

<sup>4</sup> Department of Pharmaceutical Chemistry, Maharishi Arvind College of Pharmacy, Ambabari Circle, Jaipur 302 039, India; jawedpharma@gmail.com

<sup>5</sup> Department of Pharmacology, Raghukul College of Pharmacy, Bhopal, Madhya Pradesh 462 003, India; aliabutahir2009@gmail.com

<sup>6</sup> Department of Pharmacy, Mohammed Al-Mana College for Medical Sciences, Dammam 34222, Saudi Arabia; wasimahmadansari@yahoo.com

<sup>7</sup> Indian Pharmacopoeia Commission, Ministry of Health & Family Welfare, Government of India, Ghaziabad, Uttar Pradesh, India; ankur.niperkolkata@gmail.com

<sup>8</sup> Department of Pharmacognosy, College of Pharmacy, Taif University, P.O. Box 11099, Taif 21944, Saudi Arabia; abuali@tu.edu.sa

\* Correspondence: abuali@tu.edu.sa (Abuzer Ali)

---

## Supplementary electronic material

**Morusflavone:** UV (MeOH,  $\lambda_{\text{max}}$ , nm): 241, 264, 310 (log  $\epsilon$  4.1, 4.2, 3.7) [1]; IR (KBr,  $\nu_{\text{max}}$ ,  $\text{cm}^{-1}$ ): 3399, 3210, 2965, 2913, 2855, 1680, 1653, 1623, 1554, 1445, 1417, 1361, 1291, 1237, 1165, 1132, 1054, 978, 836 [1]; <sup>1</sup>H NMR (DMSO-*d*<sub>6</sub>, 300 MHz):  $\delta$  ppm, 6.45 (1H, brs, H-3), 6.28 (1H, brs, H-6), 7.07 (1H, d,  $J$  = 8.4 Hz, H-5'), 6.37 (1H, d,  $J$  = 8.4 Hz, H-6'), 5.13 (1H, brs, H-1'''), 3.26 (1H, m, H-3'''), 1.57 (3H, brs, Me-4'''), 1.39 (3H, d,  $J$  = 6.5 Hz, Me-5'''), 3.24 (1H, dd,  $J$  = 7.3, 6.6 Hz, H<sub>2</sub>-1''a), 3.03 (1H, dd,  $J$  = 7.3, 6.3 Hz, H<sub>2</sub>-1''b), 5.03 (1H, brt,  $J$  = 6.6 Hz, H-2''), 1.52 (3H, brs, Me-4''), 1.53 (3H, brs, Me-5'') [1]; <sup>13</sup>C NMR (DMSO-*d*<sub>6</sub>, 75 MHz):  $\delta$  ppm 160.83 (C-2), 102.76 (C-3), 181.61 (C-4), 160.03 (C-5), 97.68 (C-6), 161.41 (C-7), 106.53 (C-8), 158.79 (C-9), 105.30 (C-10), 130.55 (C-1'), 119.25 (C-2'), 154.87 (C-3'), 156.15 (C-4'), 111.29 (C-5'), 103.42 (C-6'), 23.21 (C-1''), 122.01 (C-2''), 130.09 (C-3''), 24.90 (C-4''), 24.92 (C-5''), 121.56 (C-1'''), 130.57 (C-2'''), 78.69 (C-3'''), 20.83 (C-4'''), 16.93 (C-5''') [1]; +ve FAB-MS ( $m/z$ ,  $I_{\text{rel}}$ , %): 421 [M+H]<sup>+</sup> (C<sub>25</sub>H<sub>25</sub>O<sub>6</sub>) (31.8), 351 (8.7), 200 (5.3), 220 (3.8) [1].

## Reference

1. Ali, A.; Ali M. Isolation and structure elucidation of a new linoleyl glycoside and flavones from the stem bark of *Morus alba* L. Future J. Pharm. Sci. 2016, 2, 82-86. <https://doi.org/10.1016/j.fjps.2016.09.002>
